# Supplementary material for: Characterization of Food Packaging Films with Blackcurrant Fruit Waste as a Source of Antioxidant and Color Sensing Intelligent Material
Source: MDPI journal article supplement (doi:10.3390/molecules26092569), 2021-04-28
Supplement: s1 [file s1]

Supplementary Material

# Characterization of Food Packaging Films with Blackcurrant Fruit Waste as a Source of Antioxidant and Color Sensing Intelligent Material

Mia Kurek <sup>1,\*</sup>, Nasreddine Benbettaieb <sup>2,3</sup>, Mario Ščetar <sup>1</sup>, Eliot Chaudy <sup>2</sup>, Maja Repajić <sup>1</sup>, Damir Klepac <sup>4,5</sup>, Srećko Valić <sup>4,5</sup>, Frédéric Debeaufort <sup>2,3</sup> and Kata Galić <sup>1</sup>

<sup>1</sup> Faculty of Food Technology and Biotechnology, Pierottijeva 6, 10000 Zagreb, Croatia; mscetar@pbf.hr (M.Š.); maja.repajic@pbf.unizg.hr (M.R.); kgalic@pbf.hr (K.G.)

<sup>2</sup> Department of BioEngineering, Institute of Technology, University of Burgundy, 7 Blvd Docteur Petitjean, BP 17867, F-21078 Dijon, CEDEX, France; nasreddine.benbettaieb@u-bourgogne.fr (N.B.); chaudy.eliot1@gmail.com (E.C.); frederic.debeaufort@u-bourgogne.fr (F.D.)

<sup>3</sup> UMR PAM A 02.102, Agrosup Dijon, Univ. Bourgogne Franche-Comté, F-21000 Dijon, France

<sup>4</sup> Faculty of Medicine, University of Rijeka, Braće Branchetta 20, 51000 Rijeka, Croatia; damir.klepac@medri.uniri.hr (D.K.); svalic@medri.uniri.hr (S.V.)

<sup>5</sup> Centre for Micro- and Nanosciences and Technologies, University of Rijeka, Radmile Matejčić 2, HR-51000 Rijeka, Croatia

\* Correspondence: mkurek@pbf.hr; Tel.: +385-1460-5003

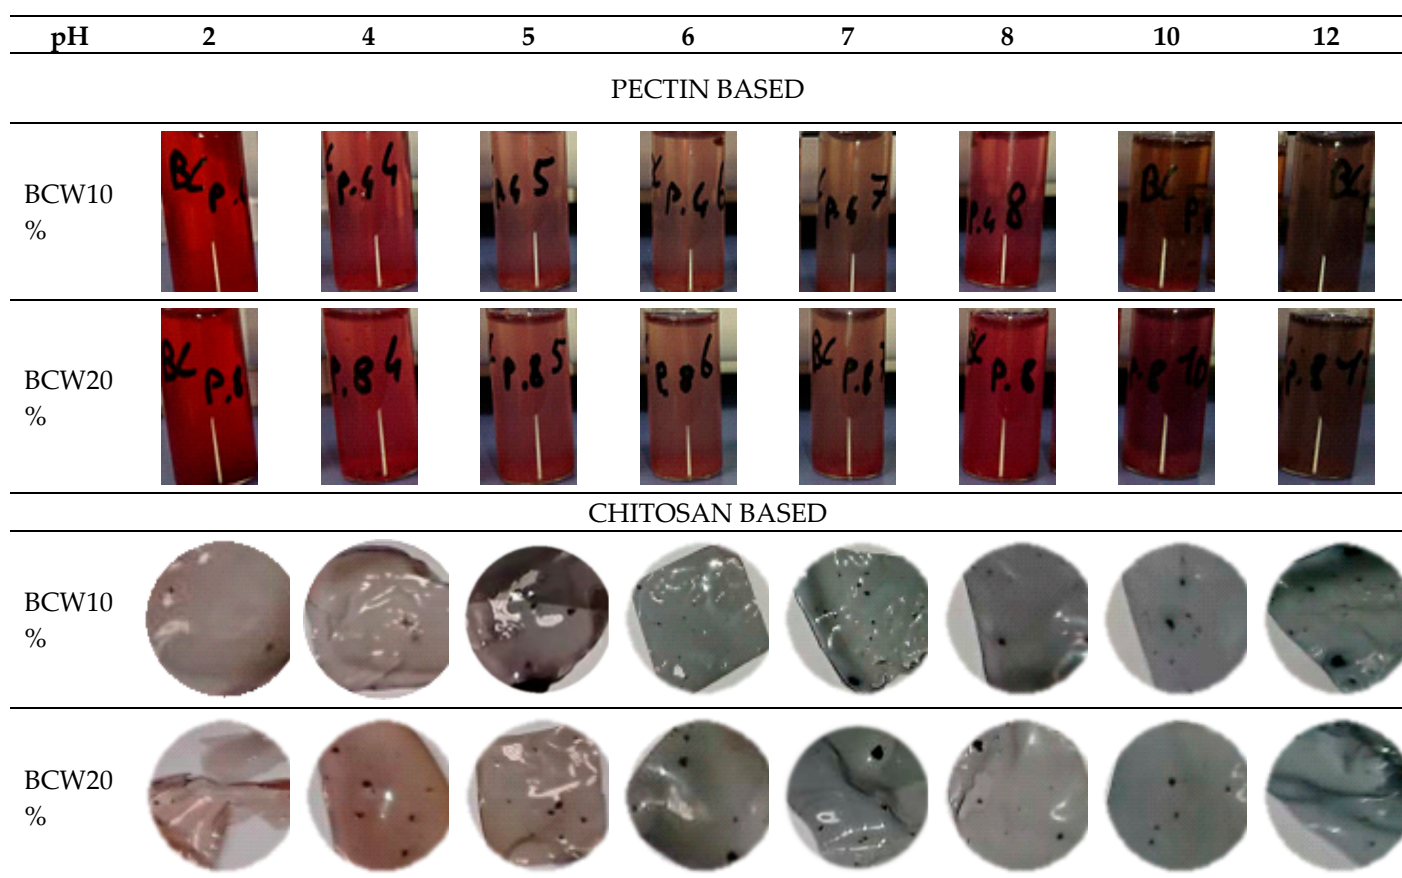

**Figure S1.** Photos of chitosan and pectin films with blackcurrant powder (BCW) (10 and 20%).

**Table S1.** FTIR spectral data ( $\nu$  –stretching; as-asymmetrical, s-symmetrical,  $\delta$  -deformation) of chitosan (CS) and pectin (PEC) without or with blackcurrant powder (BCW).

| Film     | $\nu$ O-H,<br>$\nu$ NH <sub>2</sub> | $\nu_{as}$ C-H | $\nu_s$ C-H | $\nu$ C=O<br>(amide I) | $\delta$ NH<br>(amide II) | $\delta$ C-H | $\nu_s$ C-O-C | $\nu$ C-O | $\nu$ C-O |
|----------|-------------------------------------|----------------|-------------|------------------------|---------------------------|--------------|---------------|-----------|-----------|
| CHITOSAN |                                     |                |             |                        |                           |              |               |           |           |
| CS       | 3647-2968                           | 2929           | 2879        | 1651                   | 1546                      | 1406         | 1151          | 1063      | 1019      |
| CS10BCW  | 3688-2981                           | 2929           | 2881        | 1650                   | 1543                      | 1406         | 1151          | 1064      | 1019      |
| CS20BCW  | 3676-2975                           | 2930           | 2881        | 1650                   | 1543                      | 1406         | 1151          | 1064      | 1019      |
| PECTIN   | $\nu$ O-H                           | $\nu$ C-H      | $\nu$ COOH  |                        | $\nu$ C=C                 | $\nu$ C-O    |               |           |           |
| PEC      | 3689-2993                           | 2934           | 1744        |                        | 1638                      | 1014         |               |           |           |
| PEC10BCW | 3674-2979                           | 2937           | 1740        |                        | 1638                      | 1015         |               |           |           |
| PEC20BCW | 3689-3000                           | 2937           | 1735        |                        | 1638                      | 1014         |               |           |           |

CS-chitosan, CS10BCW and CS20BCW-chitosan with 10 and 20% (*w/w*) blackcurrant powder, PEC-pectin. PEC10BCW and PEC20BCW-pectin with 10 and 20% (*w/w*) blackcurrant powder.
